# Supplementary material
Source: MDPI journal article supplement (https://www.mdpi.com/2311-7524/10/5/432)
Supplement: s1 [file s1]

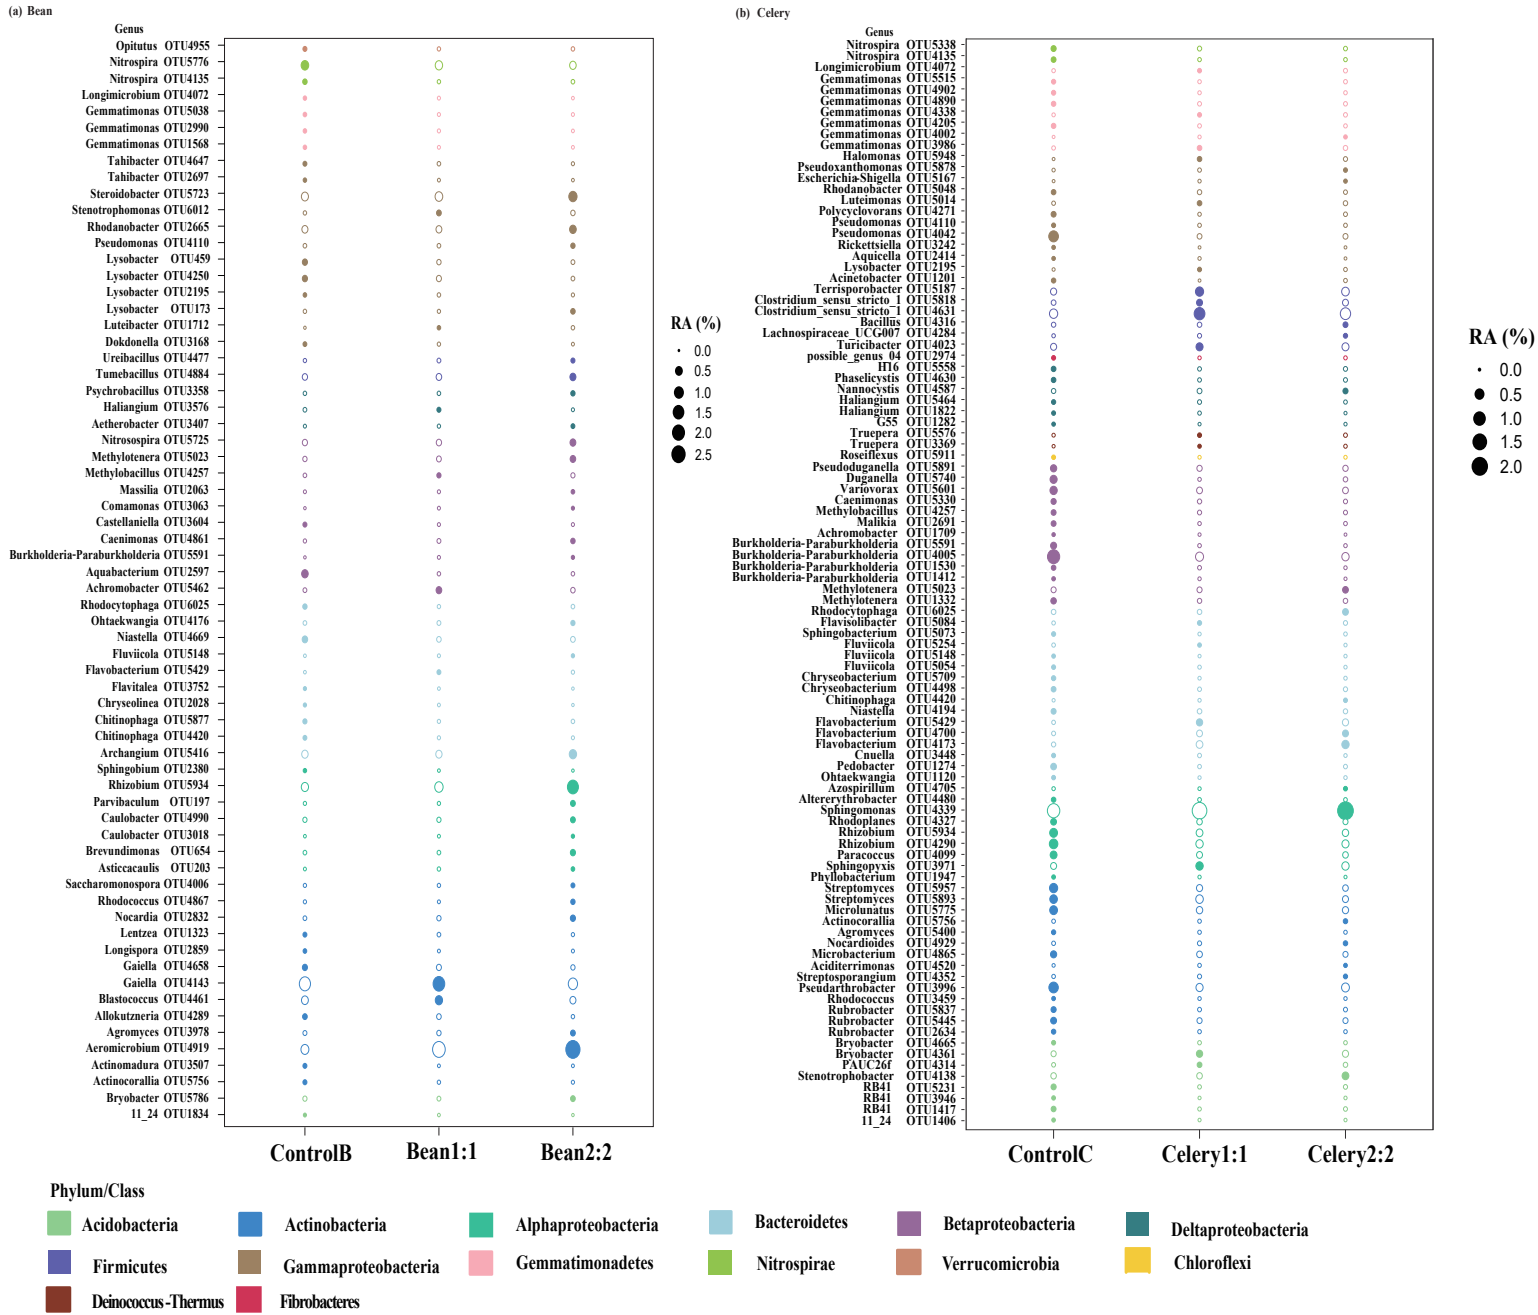

**Figure S5** Bacterial taxa sensitive OTUs to rotational strip bean (a) and celery (b) intercropping by both indicator species analysis and likelihood ratio test. Solid circles represent sensitive OTU enrichment in the treatment.
