# Supplementary material
Source: MDPI journal article supplement (https://www.mdpi.com/2311-7524/10/5/432)
Supplement: s1 [file s1]

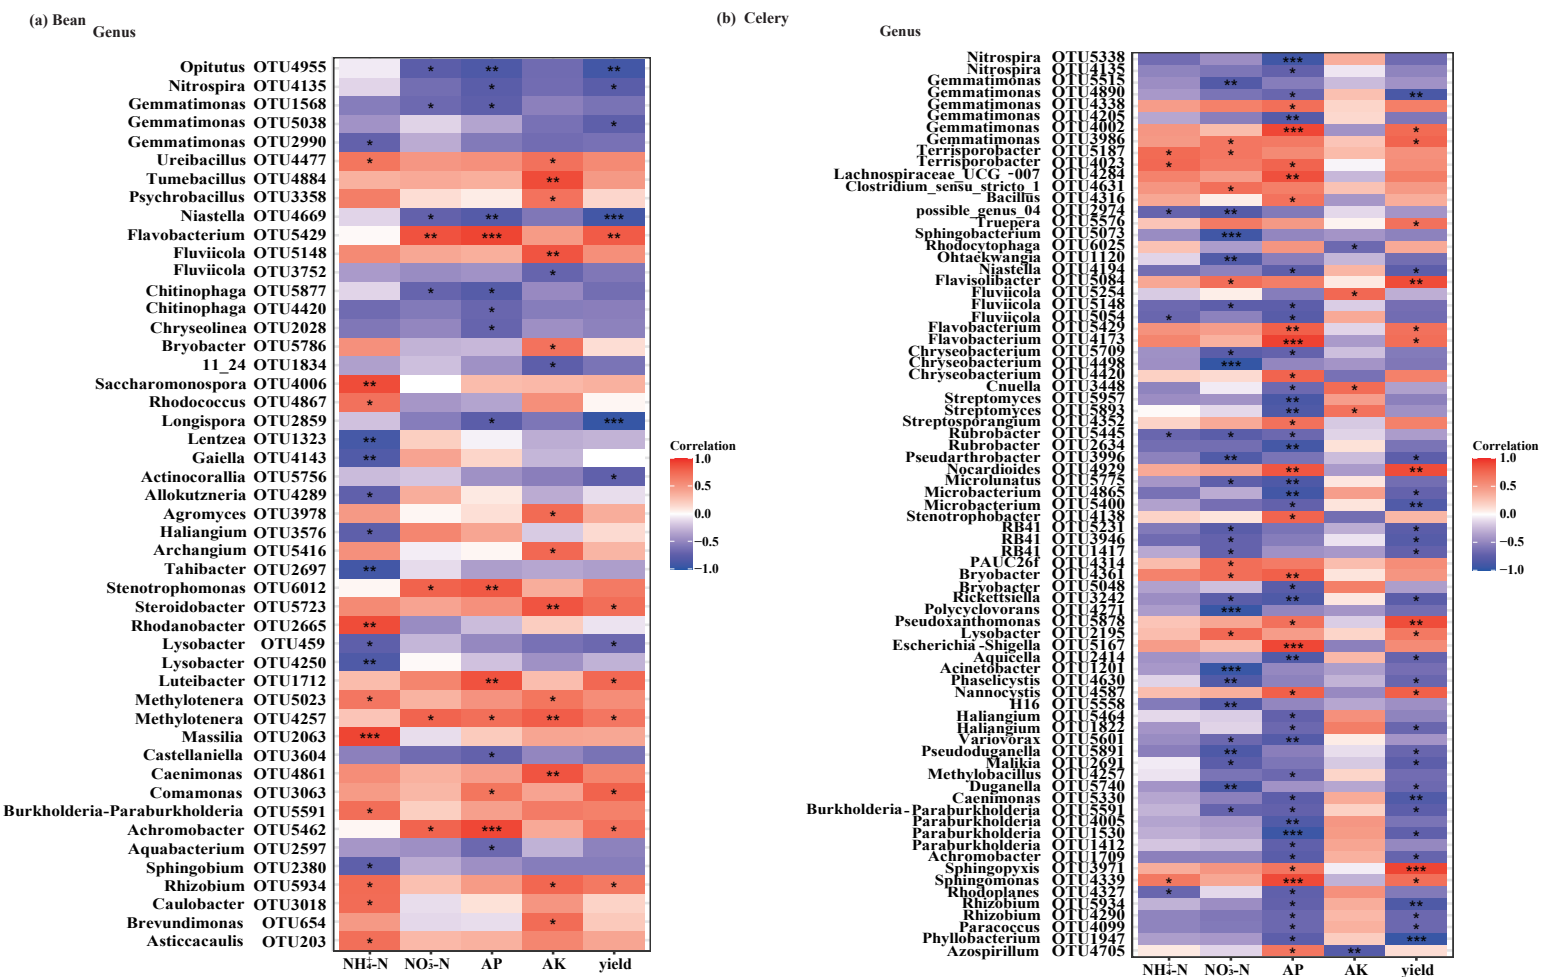

**Fig. S6** Spearman correlation heatmap of bacterial sensitive OTUs of bean (a) and celery (b) soil samples by rotational strip intercropping. Sensitive OTUs not related to soil nutrients or yield were not shown. \*\*\*, \*\* and \*, significant at 0.001, 0.01 and 0.05 probability levels, respectively.
