# Supplementary material
Source: MDPI journal article supplement (https://www.mdpi.com/2311-7524/10/5/432)
Supplement: s1 [file s1]

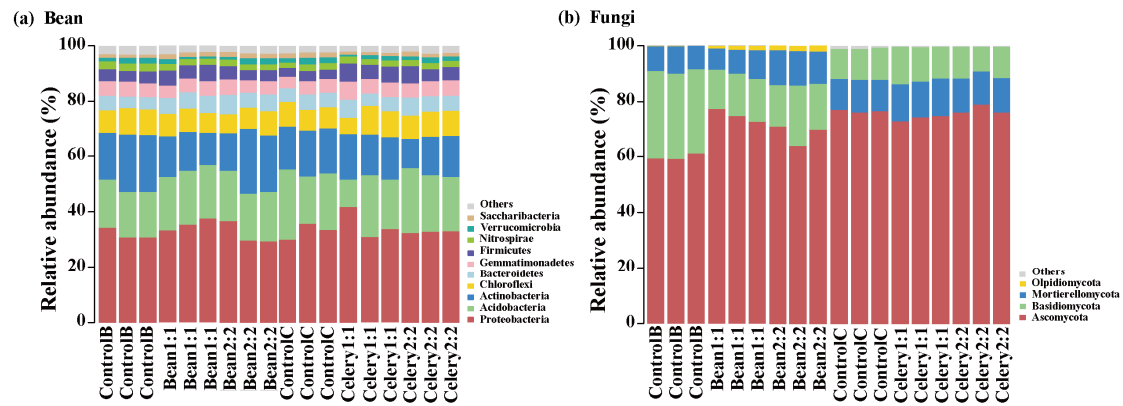

**Figure S1** Taxonomic profiles of bacteria (a) and fungi (b) communities at phylum level. Bacteria and fungi phyla with relative abundances lower than 1% were summarized with ‘other’.

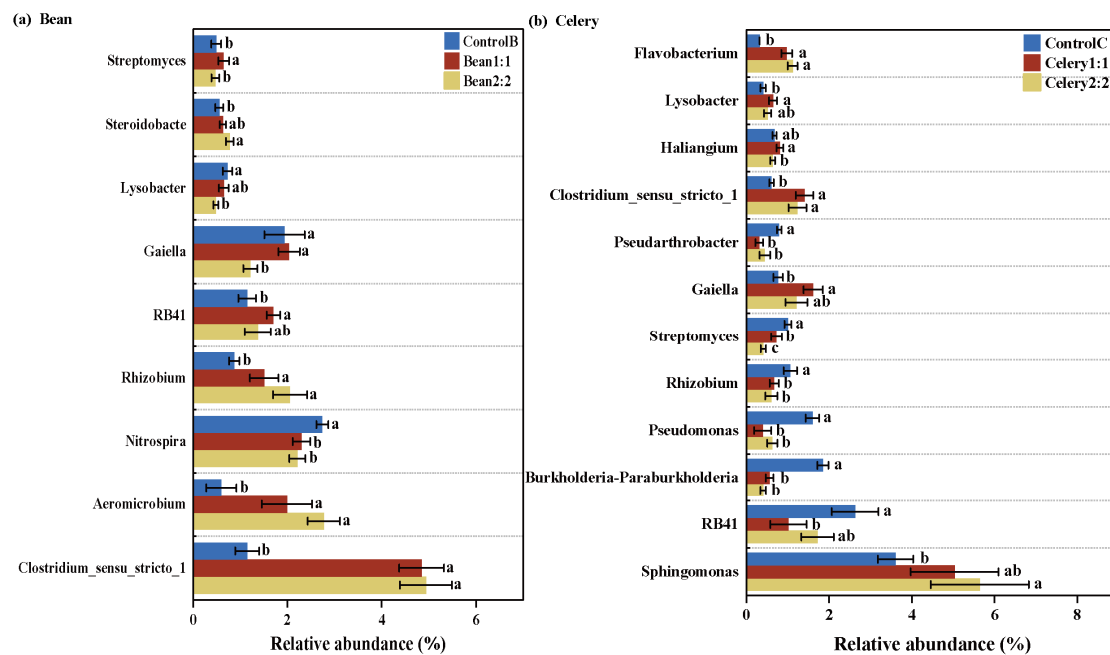

**Figure S2** Bacterial genus with average relative abundances > 0.5% altered by rotational strip intercropping of bean (a) and celery (b). Values (mean  $\pm$  standard error) in the same column followed by different letters are significantly different ( $p < 0.05$ , Tukey's HSD test).

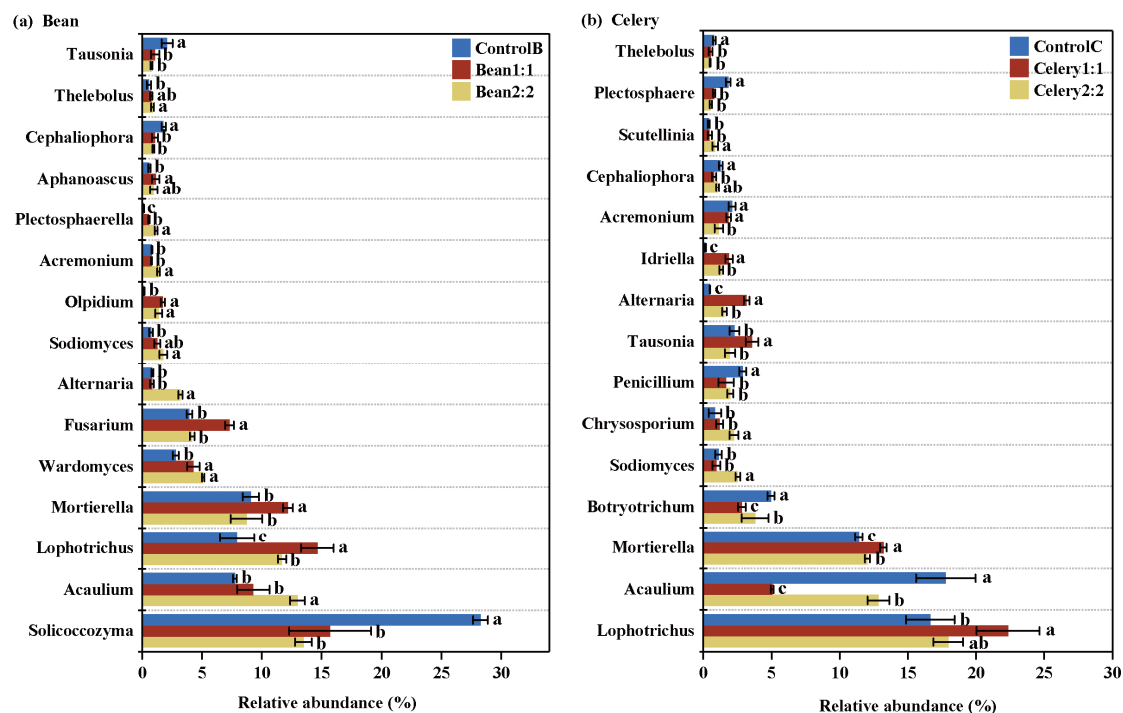

**Figure S3** Fungi genus with average relative abundances > 0.5% altered by rotational strip intercropping of bean (a) and celery (b). Values (mean  $\pm$  standard error) in the same column followed by different letters are significantly different ( $p < 0.05$ , Tukey's HSD test).

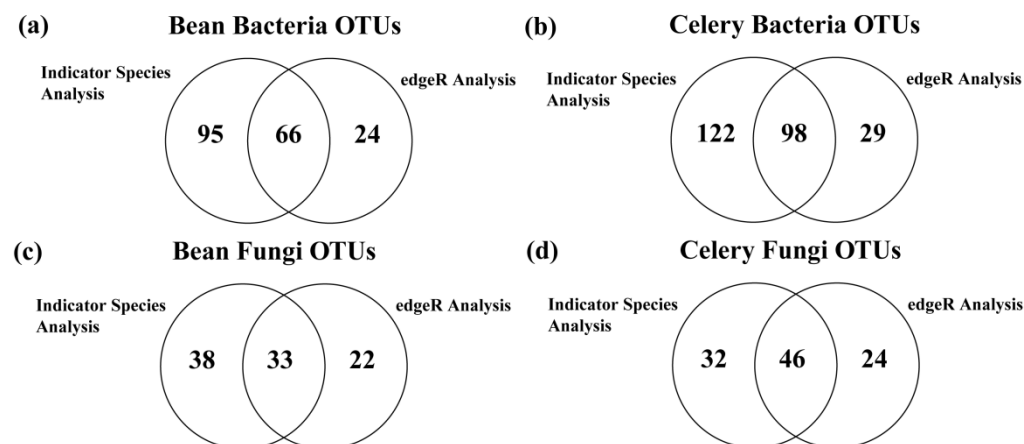

**Figure S4** The Venn Diagram represent sensitive bacteria and fungi OTUs numbers in bean (a, b) and celery (c, d) samples.

**Table S1 Effects of rotational strip bean and celery intercropping on *Pn* and Illuminance.**

|           | 2020Autumn                                                          |                                                                         | 2021Spring                                                          |                                                                         | 2021Autumn                                                          |                                                                         |
|-----------|---------------------------------------------------------------------|-------------------------------------------------------------------------|---------------------------------------------------------------------|-------------------------------------------------------------------------|---------------------------------------------------------------------|-------------------------------------------------------------------------|
|           | Illuminance ( $\mu\text{mol}\cdot\text{m}^{-2}\cdot\text{s}^{-1}$ ) | Pn ( $\mu\text{mol}(\text{CO}_2)\cdot\text{m}^{-2}\cdot\text{s}^{-1}$ ) | Illuminance ( $\mu\text{mol}\cdot\text{m}^{-2}\cdot\text{s}^{-1}$ ) | Pn ( $\mu\text{mol}(\text{CO}_2)\cdot\text{m}^{-2}\cdot\text{s}^{-1}$ ) | Illuminance ( $\mu\text{mol}\cdot\text{m}^{-2}\cdot\text{s}^{-1}$ ) | Pn ( $\mu\text{mol}(\text{CO}_2)\cdot\text{m}^{-2}\cdot\text{s}^{-1}$ ) |
| ControlB  | 597.5+18.13a                                                        | 14.3+0.36c                                                              | 460.0+23.75b                                                        | 11.3+0.66c                                                              | 472.5+18.13b                                                        | 4.8+0.35a                                                               |
| Bean1:1   | 663.8+26.38a                                                        | 18.8+0.20a                                                              | 540.0+15.00a                                                        | 16.8+1.06a                                                              | 538.8+26.38a                                                        | 4.3+0.15a                                                               |
| Bean2:2   | 547.5+32.63a                                                        | 16.3+0.35b                                                              | 478.8+28.51a                                                        | 14.0+0.50b                                                              | 422.5+32.63b                                                        | 4.7+0.23a                                                               |
| ControlC  | 708.8+43.13a                                                        | 15.2+1.23a                                                              | 671.3+23.8a                                                         | 10.9+0.70b                                                              | 458.8+43.13a                                                        | 4.9+0.32b                                                               |
| Celery1:1 | 113.8+12.00c                                                        | 15.6+1.08a                                                              | 327.5+15.63c                                                        | 14.3+0.78a                                                              | 76.3+12.00c                                                         | 6.6+0.26a                                                               |
| Celery2:2 | 200.0+13.00b                                                        | 16.3+1.18a                                                              | 431.3+47.9b                                                         | 15.0+0.61a                                                              | 137.5+13.00b                                                        | 5.2+0.25b                                                               |

Values (mean  $\pm$  standard error) in the same column followed by different letters are significantly different ( $p < 0.05$ , Tukey's HSD test)
