# Supplementary material
Source: MDPI journal article supplement (https://www.mdpi.com/2311-7524/10/5/432)
Supplement: s1 [file s1]

Archive with 3 entries (3 files):
- Figure S5.pdf
- Figure S6.pdf
- Supplementary Materials.pdf
